# Supplementary material for: miR-18a increases insulin sensitivity by inhibiting PTEN
Source: Aging (Albany NY). 2020 Dec 3;13(1):1357–68. doi: 10.18632/aging.202319 (PMC7835052; doi:10.18632/aging.202319)
Supplement: Supplementary Figures [file aging-13-202319-s001.pdf]

SUPPLEMENTARY FIGURES

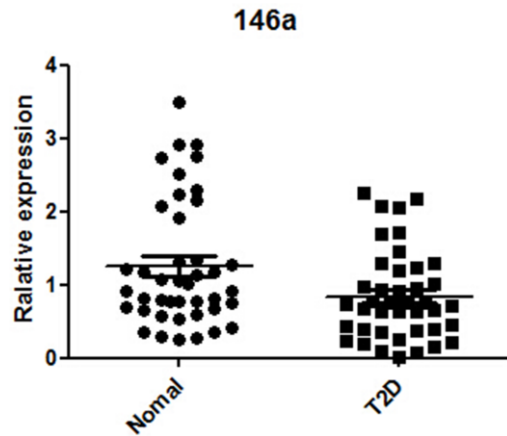

Supplementary Figure 1. The expression of miR-146a in T2DM.

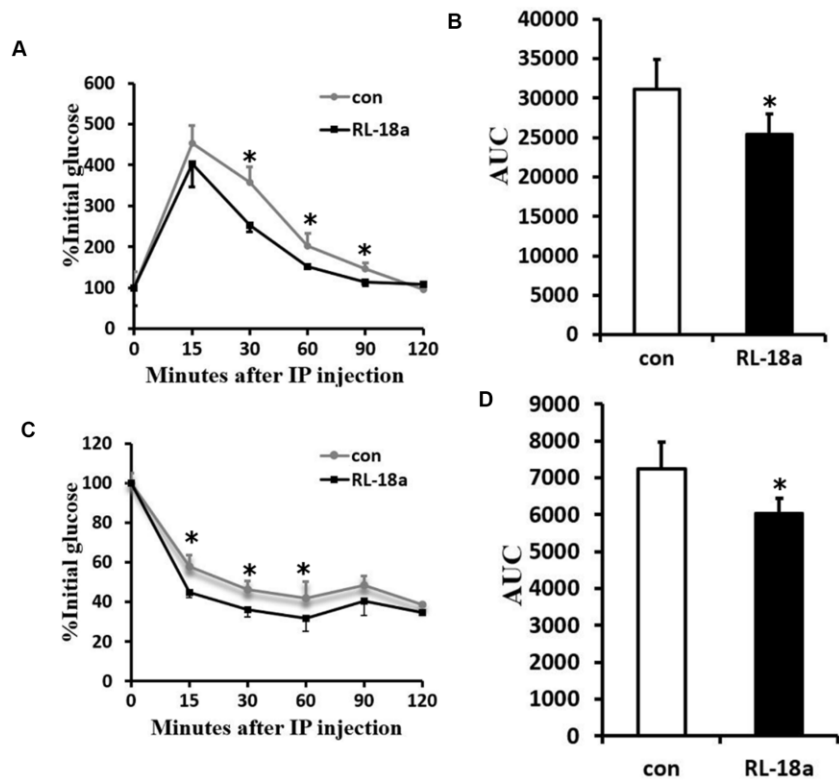

**Supplementary Figure 2. RL-18a female mice displayed improved glucose tolerance and enhanced insulin sensitivity.** (A, B) GTT in 12-hour-fasted female mice (A) and AUC for this GTT (B). (C, D) ITT in 12-hour-fasted female mice (C) and AUC for this ITT (D). RL-18a female mice ( $n = 6$ ) vs control female mice ( $n = 6$ ).
